# Supplementary material
Source: MDPI journal article supplement (https://www.mdpi.com/2227-9040/12/1/1)
Supplement: s1 [file s1]

Supplementary Materials

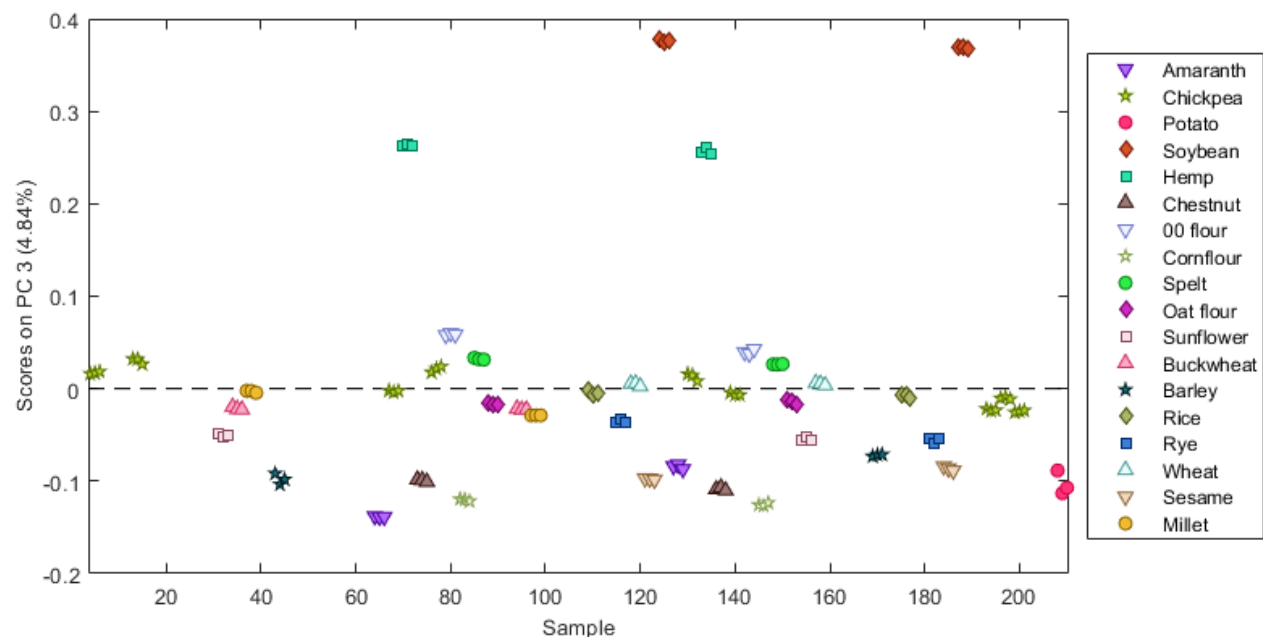

Figure S1. Scores on PC3 vs samples. Soybean and hemp flours are characterized by higher PC3 values with respect to the others.

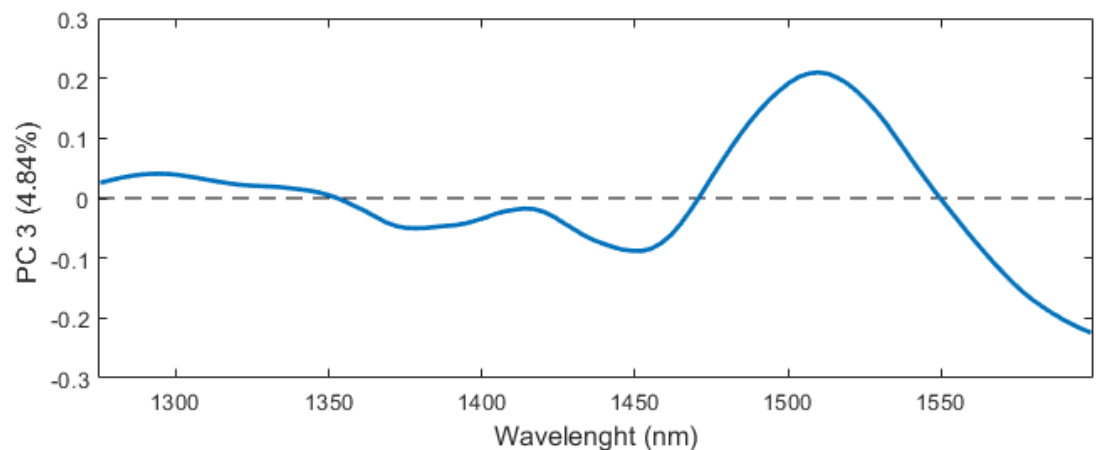

Figure S2. PC3's loadings plot. The region between 1480 and 1550 nm is the major responsible for the high values of PC3 scores of soybean and hemp flours.
